# Supplementary material
Source: PubMed Central journal article supplement (PMC4707829)
Supplement: npp2015210x1.pdf [file npp2015210x1.pdf]

## Supplementary Figure 1

Forward Primer CpG 1  
CCTAGAGCAATTTTGTGTTTGAAGAGCACAG**AACACCCTGTTCTGAATGTGGCTGG**CACATGAACT**CGATGTGCTG**  
CpG 2  
ACAGCAAT**TTTGTTCCTCCGATT**AAAAATGGGGGTGGGGAGCATAACAGCAGTAACAAAACTGAAATGTGAGAACCCC  
AAAACTGTACAGCTTGTATTTTCAGGAAGCAAAACTGAGGAAGAGGCTGCAACTTTTTTAAAAAAGTGCTGTAAAT  
CpG 3 CpG 4  
GCCCCAGCCTAAGATGT**AGCTCGGTGAGCCCTG**CTTTCCCTTTTCTAATTATAGTAGCTGGTGTCTGATAGCT  
CpG 5  
CTGCACT**CG**TCCCCAAAGACTGGGTGATGGGCTCTGAA**CGGCAGTGTGTAATGGCATCACTACTAGGAAAGACT**  
GGTCATCTGGCTAGCAGAACCCAGGGTGGGACCAGTCAATGA**CACTGGGCAAGGGTCCCAGGAGAG**TGGATGTT  
Reverse Primer

### Supplemental Figure Legend:

Schematic representation of the mouse *fkbp5* intron 5 sequence analyzed for DNA methylation. The genomic location of the sequence shown is chr17:28,420,293-28,420,742 (mm10). The primer locations are depicted in yellow. Functional glucocorticoid response elements (GREs) are shown in bold. The CG dinucleotides included in our assay are highlighted in red and numbered accordingly.
