# Supplementary material
Source: PubMed Central journal article supplement (PMC4707829)
Supplement: npp2015210x2.pdf [file npp2015210x2.pdf]

# Supplementary Figure 2

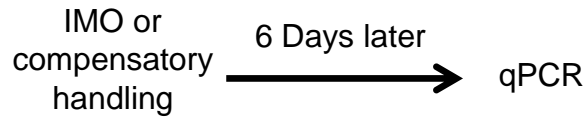

## Amygdala *Fkbp5* mRNA basal conditions

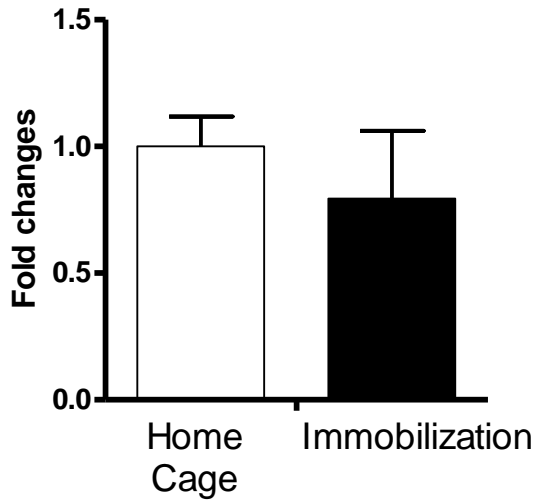

**Supplemental Figure Legend:** *Fkbp5* mRNA levels are equivalent in basal conditions in mice with a previous exposure to stress immobilization (IMO) when compared to home cage controls. (n=4-8 per group).
